# Supplementary material for: Temporal variability of tropospheric ozone and ozone profiles in Korean Peninsula during the East Asian summer monsoon: Insights from multiple measurements and reanalysis datasets
Source: Copernicus journal article supplement (doi:10.5194/acp-2022-462), 2022-07-26
Supplement: Supplementary file [file acp-2022-462-RC2-supplement.pdf]

This manuscript analyzes the temporal variations of the ground-level ozone and ozone profiles measured by ozonesonde in Korean Peninsula. A summer ozone bimodal pattern was found and the effects of the East Asian monsoons on it were assessed. The authors also characterized the temporal variations using satellite measurements and chemical reanalysis products. This study could be a useful reference to understanding the spatiotemporal variation of ozone in the Korean peninsula. In general, I recommend this manuscript for publication after the following comments being addressed.

1. More details for processing of satellite and chemical reanalysis data should be provided, did the authors consider vertical resolution effects between different data?
2. Part of the OMI data is not available due to row anomaly after 2009, how do the authors deal with these gap.
3. The top legends in Figure 4 are not clear, please change the color of the legends.
4. Both “O<sub>3</sub>” and “ozone” appear in the article, please use one of them throughout the manuscript.
